# Supplementary material for: Acute inorganic nitrate ingestion does not impact oral microbial composition, cognitive function, or high-intensity exercise performance in female team-sport athletes
Source: PubMed Central journal article supplement (PMC11568988; doi:10.1007/s00421-024-05552-w), 2024-07-17
Supplement: 421_2024_5552_MOESM1_ESM.pdf [file 421_2024_5552_MOESM1_ESM.pdf]

```

#After DADA2 Processing
RT01 <- phyloseq(otu_table(seqtab.nochim, taxa_are_rows=FALSE),tax_table(taxa), sample_data(samdata))

#add phylo tree
RT01 <- subset_taxa(RT01, Kingdom == 'Bacteria') #keep only bacterial reads
random_tree = rtree(ntaxa(RT01), rooted=TRUE, tip.label=taxa_names(ps)) #produce a rooted tree
#Warning message:
#In rtree(ntaxa(Tan_data), rooted = TRUE, tip.label = taxa_names(ps)) :
#vector 'tip.label' longer than 'n': was shorten
RT01_treed = merge_phyloseq(RT01, random_tree)

#decontaminate
contamdf.prev <- isContaminant(RT01_treed, method="prevalence", neg="is.neg", threshold=0.5)
#Warning message:
#In isContaminant(RT01_treed, method = "prevalence", neg = "is.neg", :
#Removed 1 samples with zero total counts (or frequency).
table(contamdf.prev$contaminant)
head(which(contamdf.prev$contaminant))
#[1] 464 2188
RT01_decontam <- prune_taxa(!contamdf.prev$contaminant, RT01_treed)
RT01_decontam
#phyloseq-class experiment-level object
#otu_table() OTU Table: [ 2558 taxa and 30 samples ]
#sample_data() Sample Data: [ 30 samples by 4 sample variables ]
#tax_table() Taxonomy Table: [ 2558 taxa by 6 taxonomic ranks ]
#phy_tree() Phylogenetic Tree: [ 2558 tips and 2557 internal nodes ]

#RT01 rarefaction and removal of low read samples

sort(phyloseq::sample_sums(RT01_decontam)) #sort by read counts
#Blank Pos S11V3B S11MPV4A S1V4A2 S18V3B S15V4A S15V3B S2V3A S1V3B2 S5V3A3
#0 0 47 2223 3071 3545 3555 4339 4680 4973 5296
#S10V4B S20V3A S5V4B S6V4A3 S16V4B S3CRV3B S14MHV4B S9V4B2 S18V4A S2V4B
S16V4A
#5446 5451 5516 5831 6036 6135 6179 8164 9185 9253 9261
#S14MHV3A S3CRV3A S12V4A2 S6V3B3 S10V3A S12V3B2 S20V4B S9V3A2
#9613 10191 10340 11942 11985 14682 15083 16839

Tan <- subset_samples(RT01_decontam, sample_sums(RT01_decontam) > 1000)
Tan
#phyloseq-class experiment-level object
#otu_table() OTU Table: [ 2558 taxa and 27 samples ]
#sample_data() Sample Data: [ 27 samples by 4 sample variables ]
#tax_table() Taxonomy Table: [ 2558 taxa by 6 taxonomic ranks ]
#phy_tree() Phylogenetic Tree: [ 2558 tips and 2557 internal nodes ]

```

RT01\_decontam

#phyloseq-class experiment-level object

#otu\_table() OTU Table: [ 2558 taxa and 30 samples ]

#sample\_data() Sample Data: [ 30 samples by 4 sample variables ]

#tax\_table() Taxonomy Table: [ 2558 taxa by 6 taxonomic ranks ]

#phy\_tree() Phylogenetic Tree: [ 2558 tips and 2557 internal nodes ] #compare new data to old

Tan\_R = rarefy\_even\_depth(Tan, rngseed=1, sample.size = 2223, replace = FALSE, verbose = TRUE)

RT01\_rarefied

#phyloseq-class experiment-level object

#otu\_table() OTU Table: [ 2160 taxa and 27 samples ]

#sample\_data() Sample Data: [ 27 samples by 4 sample variables ]

#tax\_table() Taxonomy Table: [ 2160 taxa by 6 taxonomic ranks ]

#phy\_tree() Phylogenetic Tree: [ 2160 tips and 2159 internal nodes ]

#RT01 relative abundance

top100 <- names(sort(taxa\_sums(Tan), decreasing=TRUE))[1:100]

> top100\_trs <- transform\_sample\_counts(Tan, function(OTU) OTU/sum(OTU))

> top100\_prune <- prune\_taxa(top100, top100\_trs)

> merge = merge\_samples(top100\_prune, "Beetroot")

> sample\_data(merge)\$Beetroot <- levels(sample\_data(Tan)\$Beetroot)

> merge.100 = transform\_sample\_counts(merge, function(x) 100 \* x/sum(x))

> p1 <- plot\_bar(merge.100, "Beetroot", "Abundance", "Phylum") #change to p2 and genus, below is final code to make graphs, change that to p1 for phylum graph

p2 + geom\_bar(aes(color=Genus, fill=Genus), stat="identity", position='stack') + xlab("Supplementation") +

ylab("Percent Abundance") + ggtitle("Effect of Beetroot on Relative Genus Abundance of the Oral

Microbiome") + theme\_bw() + theme(axis.text.x=element\_text(size=12),

axis.text.y=element\_text(size=14),axis.title=element\_text(size=16), title = element\_text(size=16))

#RT01 alpha

pal = c("#E69F00", "#0072B2") #color palette

richness <- plot\_richness(tan\_R, "Beetroot", measures=c("Shannon", "Chao1"), color="Beetroot") +

geom\_boxplot() + theme\_bw() + scale\_colour\_brewer("Beetroot", palette="Set1") +

scale\_fill\_brewer("Beetroot", palette="Set1") + xlab("Supplementation with Beetroot") + ylab("Diversity Index")

+ ggtitle("Effect of Beetroot on Alpha Diversity of the Oral Microbiome") +

theme(axis.text.x=element\_text(size=12), axis.text.y=element\_text(size=14),axis.title=element\_text(size=16),

title = element\_text(size=16)) + geom\_point(size = 5) + scale\_color\_manual(values=pal)

resultsS <- estimate\_richness(tan\_R, measures = 'Chao1') #change all to shannon for shannon

d = sample\_data(tan\_R) #variables are in your sample data

resS <- cbind(resultsS, d)

resS

shapiro.test(resS\$Chao1)

aov<- aov(Chao1~Beetroot, data=resS)

summary(aov)

#both yielded non significant findings. Shapiro wilk p>0.05, anovas p>0.05.

#RT01 - beta diversity

```

ord <- ordinate(tan_R, "PCoA", "wunifrac") #change to unifrac for unweighted
plot_ord <- plot_ordination(tan_R, ord, type="samples", color="Beetroot", title="Beta Diversity Across Sample
Types") + geom_point(size=5) #use unweighted unifrac ord for that plot
#ran betadisper (p>0.05), ran permanova for both too, p>0.05. Not significant.
#betadisper code
distance = distance(tan_R, "UniFrac")
> groups <- sample_data(tan_R)$Beetroot
> mod <- betadisper(distance, groups)
> permutest(mod)
#permanova code
dist = distance(tan_R, "wunifrac")
> adonis(dist ~ Beetroot, as(sample_data(tan_R), "data.frame"))
#unweighted
plot_orduw + xlab("PC 1 [19.9%]") + ylab("PC 2 [11.1%]") + ggtitle("Effect of Beetroot on Beta Diversity of the
Oral Microbiome (Unweighted Unifrac)") + theme_bw() + theme(axis.text.x=element_text(size=12),
axis.text.y=element_text(size=14),axis.title=element_text(size=14), title = element_text(size=16),
+
legend.title = element_text(size = 14),
+
legend.text = element_text(size = 12)
#weighted unifrac
plot_ord + xlab("PC 1 [35.6%]") + ylab("PC 2 [18.2%]") + ggtitle("Effect of Beetroot on Beta Diversity of the
Oral Microbiome (Weighted Unifrac)") + theme_bw() + theme(axis.text.x=element_text(size=12),
axis.text.y=element_text(size=14),axis.title=element_text(size=14), title = element_text(size=16),
+
legend.title = element_text(size = 14),

#Maaslin Stats to check for differential ASVs
analysisdata_pruned_abund <- microbiome::transform(Tan,
transform = "compositional",
target = "OTU", shift = 0,
scale = 1)
ASVs <- as.data.frame(analysisdata_pruned_abund@otu_table) #convert to dataframe
input_data <- as.data.frame(t(ASVs))
meta <- as.matrix(analysisdata_pruned_abund@sam_data)
meta <- as.data.frame(meta) #make datafram
library(Maaslin2)

fit_data = Maaslin2(
input_data = ASVs,
input_metadata = meta,
output = "/Data_Sets/Tan_Seqs/RT01_May2023", #whatever folder you've been working in.
fixed_effects = c("Beetroot"), plot_heatmap = TRUE)
#There are no associations to plot! - thus nothing significant.

```
