# Supplementary material for: Acute inorganic nitrate ingestion does not impact oral microbial composition, cognitive function, or high-intensity exercise performance in female team-sport athletes
Source: PubMed Central journal article supplement (PMC11568988; doi:10.1007/s00421-024-05552-w), 2024-07-17
Supplement: 421_2024_5552_MOESM2_ESM.pdf [file 421_2024_5552_MOESM2_ESM.pdf]

Supplementary Materials Online Resource 2: oral microbiome analysis.

Title: Acute inorganic nitrate ingestion does not impact oral microbial composition, cognitive function, or high-intensity exercise performance in female team-sport athletes

Journal: European Journal of Applied Physiology

Author names: Rachel Tan, Courtney Merrill, Chandler Riley, Maya Hammer, Ryan Kenney, Alyssa Riley, Jeffrey Li, Alexandra Zink, Sean Karl, Katherine Price, Luka Sharabidze, Samantha Rowland, Stephen Bailey, Leah Stiemsma, Adam Pennell

Corresponding author email: rachel.tan@pepperdine.edu

| sample_name      | library_ID                      | title                        | library_strategy     |
|------------------|---------------------------------|------------------------------|----------------------|
| library_source   | library_selection               | library_layout               | platform             |
| instrument_model | design_description              | filetype                     | filename             |
|                  | filename3                       | filename4                    | assembly             |
|                  |                                 |                              | fasta_file           |
| 1_oral           | 1_oral                          | 16S amplicon of buccal cells | AMPLICON METAGENOMIC |
|                  | PCR                             | paired ILLUMINA Illumina     | iSeq 100 16S PCR     |
| fastq            | S1V3B2_S1_L001_R1_001.fastq.gz  |                              |                      |
|                  | S1V3B2_S1_L001_R2_001.fastq.gz  |                              |                      |
| 2_oral           | 2_oral                          | 16S amplicon of buccal cells | AMPLICON METAGENOMIC |
|                  | PCR                             | paired ILLUMINA Illumina     | iSeq 100 16S PCR     |
| fastq            | S1V4A2_S2_L001_R1_001.fastq.gz  |                              |                      |
|                  | S1V4A2_S2_L001_R2_001.fastq.gz  |                              |                      |
| 3_oral           | 3_oral                          | 16S amplicon of buccal cells | AMPLICON METAGENOMIC |
|                  | PCR                             | paired ILLUMINA Illumina     | iSeq 100 16S PCR     |
| fastq            | S2V3A_S3_L001_R1_001.fastq.gz   |                              |                      |
|                  | S2V3A_S3_L001_R2_001.fastq.gz   |                              |                      |
| 4_oral           | 4_oral                          | 16S amplicon of buccal cells | AMPLICON METAGENOMIC |
|                  | PCR                             | paired ILLUMINA Illumina     | iSeq 100 16S PCR     |
| fastq            | S2V4B_S4_L001_R1_001.fastq.gz   |                              |                      |
|                  | S2V4B_S4_L001_R2_001.fastq.gz   |                              |                      |
| 5_oral           | 5_oral                          | 16S amplicon of buccal cells | AMPLICON METAGENOMIC |
|                  | PCR                             | paired ILLUMINA Illumina     | iSeq 100 16S PCR     |
| fastq            | S3CRV3A_S5_L001_R1_001.fastq.gz |                              |                      |
|                  | S3CRV3A_S5_L001_R2_001.fastq.gz |                              |                      |
| 6_oral           | 6_oral                          | 16S amplicon of buccal cells | AMPLICON METAGENOMIC |
|                  | PCR                             | paired ILLUMINA Illumina     | iSeq 100 16S PCR     |
| fastq            | S3CRV3B_S6_L001_R1_001.fastq.gz |                              |                      |
|                  | S3CRV3B_S6_L001_R2_001.fastq.gz |                              |                      |
| 7_oral           | 7_oral                          | 16S amplicon of buccal cells | AMPLICON METAGENOMIC |
|                  | PCR                             | paired ILLUMINA Illumina     | iSeq 100 16S PCR     |
| fastq            | S5V3A3_S7_L001_R1_001.fastq.gz  |                              |                      |
|                  | S5V3A3_S7_L001_R2_001.fastq.gz  |                              |                      |
| 8_oral           | 8_oral                          | 16S amplicon of buccal cells | AMPLICON METAGENOMIC |
|                  | PCR                             | paired ILLUMINA Illumina     | iSeq 100 16S PCR     |
| fastq            | S5V4B_S8_L001_R1_001.fastq.gz   |                              |                      |
|                  | S5V4B_S8_L001_R2_001.fastq.gz   |                              |                      |

|         |                                   |                                   |                      |
|---------|-----------------------------------|-----------------------------------|----------------------|
| 9_oral  | 9_oral                            | 16S amplicon of buccal cells      | AMPLICON METAGENOMIC |
|         | PCR                               | paired ILLUMINA Illumina iSeq 100 | 16S PCR              |
| fastq   | S6V4A3_S9_L001_R1_001.fastq.gz    |                                   |                      |
|         | S6V4A3_S9_L001_R2_001.fastq.gz    |                                   |                      |
| 10_oral | 10_oral                           | 16S amplicon of buccal cells      | AMPLICON METAGENOMIC |
|         | PCR                               | paired ILLUMINA Illumina iSeq 100 | 16S PCR              |
| fastq   | S6V3B3_S10_L001_R1_001.fastq.gz   |                                   |                      |
|         | S6V3B3_S10_L001_R2_001.fastq.gz   |                                   |                      |
| 11_oral | 11_oral                           | 16S amplicon of buccal cells      | AMPLICON METAGENOMIC |
|         | PCR                               | paired ILLUMINA Illumina iSeq 100 | 16S PCR              |
| fastq   | S9V3A2_S11_L001_R1_001.fastq.gz   |                                   |                      |
|         | S9V3A2_S11_L001_R2_001.fastq.gz   |                                   |                      |
| 12_oral | 12_oral                           | 16S amplicon of buccal cells      | AMPLICON METAGENOMIC |
|         | PCR                               | paired ILLUMINA Illumina iSeq 100 | 16S PCR              |
| fastq   | S9V4B2_S12_L001_R1_001.fastq.gz   |                                   |                      |
|         | S9V4B2_S12_L001_R2_001.fastq.gz   |                                   |                      |
| 13_oral | 13_oral                           | 16S amplicon of buccal cells      | AMPLICON METAGENOMIC |
|         | PCR                               | paired ILLUMINA Illumina iSeq 100 | 16S PCR              |
| fastq   | S10V3A_S13_L001_R1_001.fastq.gz   |                                   |                      |
|         | S10V3A_S13_L001_R2_001.fastq.gz   |                                   |                      |
| 14_oral | 14_oral                           | 16S amplicon of buccal cells      | AMPLICON METAGENOMIC |
|         | PCR                               | paired ILLUMINA Illumina iSeq 100 | 16S PCR              |
| fastq   | S10V4B_S14_L001_R1_001.fastq.gz   |                                   |                      |
|         | S10V4B_S14_L001_R2_001.fastq.gz   |                                   |                      |
| 15_oral | 15_oral                           | 16S amplicon of buccal cells      | AMPLICON METAGENOMIC |
|         | PCR                               | paired ILLUMINA Illumina iSeq 100 | 16S PCR              |
| fastq   | S11MPV4A_S15_L001_R1_001.fastq.gz |                                   |                      |
|         | S11MPV4A_S15_L001_R2_001.fastq.gz |                                   |                      |
| 16_oral | 16_oral                           | 16S amplicon of buccal cells      | AMPLICON METAGENOMIC |
|         | PCR                               | paired ILLUMINA Illumina iSeq 100 | 16S PCR              |
| fastq   | S20V4B_S28_L001_R1_001.fastq.gz   |                                   |                      |
|         | S20V4B_S28_L001_R2_001.fastq.gz   |                                   |                      |
| 17_oral | 17_oral                           | 16S amplicon of buccal cells      | AMPLICON METAGENOMIC |
|         | PCR                               | paired ILLUMINA Illumina iSeq 100 | 16S PCR              |
| fastq   | S12V4A2_S17_L001_R1_001.fastq.gz  |                                   |                      |
|         | S12V4A2_S17_L001_R2_001.fastq.gz  |                                   |                      |
| 18_oral | 18_oral                           | 16S amplicon of buccal cells      | AMPLICON METAGENOMIC |
|         | PCR                               | paired ILLUMINA Illumina iSeq 100 | 16S PCR              |
| fastq   | S12V3B2_S18_L001_R1_001.fastq.gz  |                                   |                      |
|         | S12V3B2_S18_L001_R2_001.fastq.gz  |                                   |                      |
| 19_oral | 19_oral                           | 16S amplicon of buccal cells      | AMPLICON METAGENOMIC |
|         | PCR                               | paired ILLUMINA Illumina iSeq 100 | 16S PCR              |
| fastq   | S14MHV3A_S19_L001_R1_001.fastq.gz |                                   |                      |
|         | S14MHV3A_S19_L001_R2_001.fastq.gz |                                   |                      |
| 20_oral | 20_oral                           | 16S amplicon of buccal cells      | AMPLICON METAGENOMIC |
|         | PCR                               | paired ILLUMINA Illumina iSeq 100 | 16S PCR              |
| fastq   | S14MHV4B_S20_L001_R1_001.fastq.gz |                                   |                      |
|         | S14MHV4B_S20_L001_R2_001.fastq.gz |                                   |                      |
| 21_oral | 21_oral                           | 16S amplicon of buccal cells      | AMPLICON METAGENOMIC |
|         | PCR                               | paired ILLUMINA Illumina iSeq 100 | 16S PCR              |

fastq S15V4A\_S21\_L001\_R1\_001.fastq.gz  
S15V4A\_S21\_L001\_R2\_001.fastq.gz  
22\_oral 22\_oral 16S amplicon of buccal cells AMPLICON METAGENOMIC  
PCR paired ILLUMINA Illumina iSeq 100 16S PCR  
fastq S15V3B\_S22\_L001\_R1\_001.fastq.gz  
S15V3B\_S22\_L001\_R2\_001.fastq.gz  
23\_oral 23\_oral 16S amplicon of buccal cells AMPLICON METAGENOMIC  
PCR paired ILLUMINA Illumina iSeq 100 16S PCR  
fastq S16V4A\_S23\_L001\_R1\_001.fastq.gz  
S16V4A\_S23\_L001\_R2\_001.fastq.gz  
24\_oral 24\_oral 16S amplicon of buccal cells AMPLICON METAGENOMIC  
PCR paired ILLUMINA Illumina iSeq 100 16S PCR  
fastq S16V4B\_S24\_L001\_R1\_001.fastq.gz  
S16V4B\_S24\_L001\_R2\_001.fastq.gz  
25\_oral 25\_oral 16S amplicon of buccal cells AMPLICON METAGENOMIC  
PCR paired ILLUMINA Illumina iSeq 100 16S PCR  
fastq S18V3B\_S25\_L001\_R1\_001.fastq.gz  
S18V3B\_S25\_L001\_R2\_001.fastq.gz  
26\_oral 26\_oral 16S amplicon of buccal cells AMPLICON METAGENOMIC  
PCR paired ILLUMINA Illumina iSeq 100 16S PCR  
fastq S18V4A\_S26\_L001\_R1\_001.fastq.gz  
S18V4A\_S26\_L001\_R2\_001.fastq.gz  
27\_oral 27\_oral 16S amplicon of buccal cells AMPLICON METAGENOMIC  
PCR paired ILLUMINA Illumina iSeq 100 16S PCR  
fastq S20V3A\_S27\_L001\_R1\_001.fastq.gz  
S20V3A\_S27\_L001\_R2\_001.fastq.gz
